# Supplementary material for: Changing from an unusual high-temperature demixing to a UCST-type in mixtures of 1-alkyl-3-methylimidazolium bis{(trifluoromethyl)sulfonyl}amide and arenes
Source: Royal Society of Chemistry journal article supplement (doi:10.1039/b513308d), 2006-01-01
Supplement: b513308d.pdf [file b513308d.pdf]

## Supplementary Information

### Changing from an unusual high-temperature demixing to a UCST-type in mixtures of 1-alkyl-3-methylimidazolium bis{(trifluoromethyl)sulfonyl}amide and arenes<sup>♣</sup>

Joanna Łachwa,<sup>a</sup> Jerzy Szydłowski,<sup>b</sup> Anna Makowska,<sup>b</sup>  
Kenneth R. Seddon,<sup>c</sup> José M.S.S. Esperança,<sup>a</sup> Henrique J.R. Guedes,<sup>a</sup> and Luís  
Paulo N. Rebelo<sup>a \*</sup>

<sup>a</sup> *Instituto de Tecnologia Química e Biológica, ITQB 2, Universidade Nova de Lisboa, Apartado 127, 2780-901 Oeiras, Portugal*

<sup>b</sup> *Department of Chemistry, Warsaw University, Zwirki i Wigury 101, 02-093 Warsaw, Poland*

<sup>c</sup> *The QUILL Centre, The Queen's University of Belfast, Stranmillis Road, Belfast BT9 5AG, United Kingdom*

\*Corresponding author: [luis.rebelo@itqb.unl.pt](mailto:luis.rebelo@itqb.unl.pt)

<sup>♣</sup> Adapted from a communication presented at the 1<sup>st</sup> International Congress on Ionic Liquids (COIL), June 19 – 22, 2005, Salzburg, Austria.

*Keywords:* ionic liquids; liquid-liquid equilibria; aromatic solvents; pressure effects

**Table S1** Liquid-liquid phase equilibria data of  $[C_n\text{mim}][\text{NTf}_2]$  + benzene;  $n$  is the number of carbon atoms in the alkyl chain of the substituted imidazolium;  $x_{\text{IL}}$  and  $w_{\text{IL}}$  are the mole and weight fraction of ionic liquid, respectively, and  $T$  is the temperature of transition.

| $x_{\text{IL}}$            | $w_{\text{IL}}$ | $T/\text{K}$ | $x_{\text{IL}}$ | $w_{\text{IL}}$ | $T/\text{K}$ | $x_{\text{IL}}$ | $w_{\text{IL}}$ | $T/\text{K}$ |
|----------------------------|-----------------|--------------|-----------------|-----------------|--------------|-----------------|-----------------|--------------|
| <b><math>n = 2</math></b>  |                 |              |                 |                 |              |                 |                 |              |
| 0.22927                    | 0.59844         | 300.58       | 0.23809         | 0.61022         | 343.15       | 0.24222         | 0.61559         | 360.91       |
| 0.23431                    | 0.60523         | 324.03       |                 |                 |              |                 |                 |              |
| <b><math>n = 4</math></b>  |                 |              |                 |                 |              |                 |                 |              |
| 0.17802                    | 0.53763         | 335.55       | 0.18009         | 0.54112         | 300.58       | 0.19727         | 0.56885         | 459.42       |
| 0.17802                    | 0.53763         | 422.87       | 0.18493         | 0.54916         | 280.18       |                 |                 |              |
| <b><math>n = 6</math></b>  |                 |              |                 |                 |              |                 |                 |              |
| 0.00356                    | 0.02007         | 390.55       | 0.10540         | 0.40292         | 400.68       | 0.12080         | 0.44039         | 330.28       |
| 0.00540                    | 0.03016         | 431.19       | 0.10540         | 0.40292         | 458.15       | 0.12080         | 0.44039         | 482.63       |
| 0.00631                    | 0.03512         | 451.18       | 0.11215         | 0.41979         | 368.13       | 0.12761         | 0.45589         | 297.71       |
| 0.00631                    | 0.03512         | 484.38       | 0.11215         | 0.41979         | 473.59       |                 |                 |              |
| <b><math>n = 8</math></b>  |                 |              |                 |                 |              |                 |                 |              |
| 0.00171                    | 0.01030         | 300.32       | 0.02245         | 0.12263         | 372.66       | 0.05183         | 0.24965         | 361.07       |
| 0.00263                    | 0.01577         | 324.52       | 0.02724         | 0.14563         | 374.05       | 0.05846         | 0.27428         | 352.73       |
| 0.00521                    | 0.03090         | 348.20       | 0.02833         | 0.15073         | 374.31       | 0.06670         | 0.30315         | 338.10       |
| 0.00985                    | 0.05712         | 361.72       | 0.03379         | 0.17552         | 373.93       | 0.08075         | 0.34841         | 312.59       |
| 0.01416                    | 0.08040         | 368.25       | 0.03931         | 0.19938         | 371.27       | 0.08667         | 0.36615         | 300.32       |
| 0.01805                    | 0.10065         | 370.57       | 0.04538         | 0.22444         | 367.95       |                 |                 |              |
| <b><math>n = 10</math></b> |                 |              |                 |                 |              |                 |                 |              |
| 0.00337                    | 0.02133         | 300.84       | 0.01361         | 0.08167         | 318.23       | 0.02280         | 0.13075         | 317.94       |
| 0.00430                    | 0.02706         | 305.82       | 0.01465         | 0.08746         | 318.23       | 0.02352         | 0.13440         | 317.81       |
| 0.00511                    | 0.03205         | 309.37       | 0.01506         | 0.08972         | 318.36       | 0.02454         | 0.13955         | 317.87       |
| 0.00566                    | 0.03542         | 310.85       | 0.01558         | 0.09257         | 318.48       | 0.02562         | 0.14491         | 317.53       |
| 0.00677                    | 0.04210         | 312.83       | 0.01639         | 0.09687         | 318.44       | 0.02847         | 0.15888         | 316.89       |
| 0.00759                    | 0.04696         | 314.78       | 0.01724         | 0.10159         | 318.50       | 0.03239         | 0.17749         | 315.32*      |
| 0.00844                    | 0.05199         | 315.66       | 0.01790         | 0.10514         | 318.58       | 0.03272         | 0.17900         | 314.79       |
| 0.00891                    | 0.05478         | 316.02*      | 0.01874         | 0.10961         | 318.27       | 0.03745         | 0.20051         | 311.94       |
| 0.00931                    | 0.05709         | 316.37       | 0.01878         | 0.10980         | 318.54       | 0.04044         | 0.21365         | 309.08       |
| 0.01020                    | 0.06231         | 317.11       | 0.01978         | 0.11508         | 318.46       | 0.04378         | 0.22788         | 305.77       |
| 0.01104                    | 0.06712         | 317.44       | 0.01978         | 0.11510         | 318.29*      | 0.04583         | 0.23644         | 302.45       |
| 0.01184                    | 0.07172         | 317.79       | 0.02062         | 0.11950         | 318.18       | 0.04671         | 0.24003         | 301.30       |
| 0.01187                    | 0.07184         | 317.71*      | 0.02074         | 0.12013         | 318.30       | 0.04729         | 0.24242         | 300.60       |
| 0.01280                    | 0.07710         | 317.71       | 0.02157         | 0.12442         | 318.17       |                 |                 |              |
| 0.01280                    | 0.07716         | 318.17       | 0.02241         | 0.12877         | 317.95       |                 |                 |              |

\* values obtained from linear extrapolation of  $T = f(p)$  to a nominal pressure of 0.1 MPa.

**Table S2** Liquid-liquid phase equilibria data of  $[C_n\text{mim}][\text{NTf}_2]$  + toluene;  $n$  is the number of carbon atoms in the alkyl chain of the substituted imidazolium;  $x_{\text{IL}}$  and  $w_{\text{IL}}$  are the mole and weight fraction of ionic liquid, respectively, and  $T$  is the temperature of transition.

| $x_{\text{IL}}$ | $w_{\text{IL}}$ | $T/\text{K}$ | $x_{\text{IL}}$ | $w_{\text{IL}}$            | $T/\text{K}$ | $x_{\text{IL}}$ | $w_{\text{IL}}$ | $T/\text{K}$ |
|-----------------|-----------------|--------------|-----------------|----------------------------|--------------|-----------------|-----------------|--------------|
| 0.3376          | 0.6840          | 302.25       | 0.3481          | 0.6940                     | 321.15       | 0.3513          | 0.6970          | 323.65       |
|                 |                 |              |                 | <b><math>n = 2</math></b>  |              |                 |                 |              |
| 0.2591          | 0.6142          | 298.51       |                 | <b><math>n = 4</math></b>  |              |                 |                 |              |
|                 |                 |              |                 | <b><math>n = 6</math></b>  |              |                 |                 |              |
| 0.1798          | 0.5155          | 298.52       |                 | <b><math>n = 8</math></b>  |              |                 |                 |              |
| 0.1127          | 0.3960          | 317.75       | 0.1183          | 0.4090                     | 297.45       | 0.1217          | 0.4170          | 286.65       |
|                 |                 |              |                 | <b><math>n = 10</math></b> |              |                 |                 |              |
| 0.00192         | 0.01039         | 282.75       | 0.01713         | 0.08697                    | 339.35       | 0.02572         | 0.12607         | 339.35       |
| 0.00493         | 0.02636         | 315.75       | 0.01821         | 0.09204                    | 340.18*      | 0.02588         | 0.12679         | 339.35       |
| 0.00567         | 0.03024         | 320.85       | 0.01826         | 0.09224                    | 339.65       | 0.02878         | 0.13937         | 339.45       |
| 0.00670         | 0.03554         | 325.25       | 0.01878         | 0.09470                    | 339.75       | 0.02955         | 0.14265         | 338.75       |
| 0.00805         | 0.04246         | 329.55       | 0.01883         | 0.09493                    | 339.75       | 0.03351         | 0.15929         | 339.05       |
| 0.00911         | 0.04783         | 332.65       | 0.01924         | 0.09682                    | 339.55       | 0.03572         | 0.16834         | 340.73*      |
| 0.01007         | 0.05266         | 335.55       | 0.02017         | 0.10110                    | 340.05       | 0.03967         | 0.18417         | 338.35       |
| 0.01079         | 0.05625         | 335.65       | 0.02065         | 0.10332                    | 340.15       | 0.03996         | 0.18531         | 338.30       |
| 0.01100         | 0.05730         | 337.65       | 0.02139         | 0.10670                    | 339.55       | 0.04315         | 0.19771         | 336.25       |
| 0.01197         | 0.06210         | 338.75       | 0.02298         | 0.11389                    | 339.65       | 0.04956         | 0.22178         | 334.15       |
| 0.01382         | 0.07114         | 339.55       | 0.02342         | 0.11585                    | 338.95       | 0.06314         | 0.26915         | 317.55       |
| 0.01409         | 0.07246         | 339.85       | 0.02359         | 0.11665                    | 339.65       | 0.07582         | 0.30954         | 295.55       |
| 0.01523         | 0.07792         | 339.25       | 0.02375         | 0.11736                    | 341.15*      | 0.08282         | 0.33041         | 276.65       |
| 0.01667         | 0.08478         | 340.25       | 0.02442         | 0.12032                    | 339.25       |                 |                 |              |

\* values obtained from linear extrapolation of  $T = f(p)$  to a nominal pressure of 0.1 MPa.

**Table S3** Liquid-liquid phase equilibria data of  $[C_n\text{mim}][\text{NTf}_2] + \alpha\text{-methylstyrene}$ ;  $n$  is the number of carbon atoms in the alkyl chain of the substituted imidazolium;  $x_{\text{IL}}$  and  $w_{\text{IL}}$  are the mole and weight fraction of ionic liquid, respectively, and  $T$  is the temperature of transition.

| $x_{\text{IL}}$            | $w_{\text{IL}}$ | $T/\text{K}$ | $x_{\text{IL}}$ | $w_{\text{IL}}$ | $T/\text{K}$ | $x_{\text{IL}}$ | $w_{\text{IL}}$ | $T/\text{K}$ |
|----------------------------|-----------------|--------------|-----------------|-----------------|--------------|-----------------|-----------------|--------------|
| <b><math>n = 2</math></b>  |                 |              |                 |                 |              |                 |                 |              |
| 0.44776                    | 0.72861         | 264.93       | 0.47126         | 0.74691         | 326.77       | 0.48691         | 0.75859         | 370.68       |
| 0.47126                    | 0.74691         | 326.77       | 0.47402         | 0.74900         | 330.65       | 0.50107         | 0.76881         | 412.77       |
| <b><math>n = 4</math></b>  |                 |              |                 |                 |              |                 |                 |              |
| 0.31521                    | 0.62025         | 274.59       | 0.34468         | 0.65113         | 325.87       | 0.36426         | 0.67031         | 453.83       |
| 0.32295                    | 0.62861         | 287.36       |                 |                 |              |                 |                 |              |
| <b><math>n = 6</math></b>  |                 |              |                 |                 |              |                 |                 |              |
| 0.00392                    | 0.01468         | 411.14       | 0.20867         | 0.49958         | 454.40       | 0.22246         | 0.51996         | 297.95       |
| <b><math>n = 8</math></b>  |                 |              |                 |                 |              |                 |                 |              |
| 0.00598                    | 0.02364         | 364.68       | 0.04119         | 0.14735         | 428.81       | 0.11119         | 0.33479         | 398.42       |
| 0.01302                    | 0.05040         | 406.08       | 0.05780         | 0.19795         | 428.34       | 0.12848         | 0.37229         | 369.73       |
| 0.02055                    | 0.07783         | 420.13       | 0.08091         | 0.26153         | 424.19       | 0.14882         | 0.41294         | 297.29       |
| 0.02779                    | 0.10315         | 426.00       | 0.09560         | 0.29839         | 414.91       |                 |                 |              |
| <b><math>n = 10</math></b> |                 |              |                 |                 |              |                 |                 |              |
| 0.00378                    | 0.01590         | 299.99       | 0.02674         | 0.10479         | 342.86       | 0.04604         | 0.17056         | 341.26       |
| 0.00515                    | 0.02158         | 309.41       | 0.02721         | 0.10647         | 342.73*      | 0.04713         | 0.17407         | 340.98       |
| 0.00561                    | 0.02348         | 317.71       | 0.02824         | 0.11017         | 342.95       | 0.04843         | 0.17818         | 340.47       |
| 0.00761                    | 0.03162         | 322.88       | 0.02926         | 0.11380         | 342.75       | 0.05200         | 0.18943         | 340.01       |
| 0.00831                    | 0.03445         | 325.50       | 0.03264         | 0.12255         | 343.19*      | 0.05220         | 0.19004         | 339.39       |
| 0.00885                    | 0.03664         | 327.24       | 0.03227         | 0.12439         | 343.02       | 0.05531         | 0.19965         | 338.79       |
| 0.00969                    | 0.04002         | 328.66       | 0.03400         | 0.13041         | 343.00       | 0.05871         | 0.20994         | 337.55       |
| 0.01111                    | 0.04566         | 332.72       | 0.03669         | 0.13961         | 343.05       | 0.06560         | 0.23024         | 334.23       |
| 0.01206                    | 0.04945         | 334.68       | 0.03737         | 0.14193         | 343.30*      | 0.06708         | 0.23452         | 333.01       |
| 0.01344                    | 0.05486         | 336.46       | 0.03875         | 0.14657         | 342.61       | 0.07176         | 0.24778         | 330.21       |
| 0.01617                    | 0.06545         | 339.43       | 0.03926         | 0.14829         | 343.10       | 0.07243         | 0.24964         | 328.60       |
| 0.01854                    | 0.07448         | 340.52       | 0.03990         | 0.15042         | 342.30       | 0.07592         | 0.25927         | 325.85       |
| 0.02011                    | 0.08040         | 341.08       | 0.04211         | 0.15777         | 342.23       | 0.08036         | 0.27130         | 321.02       |
| 0.02137                    | 0.08511         | 341.49       | 0.04227         | 0.15827         | 342.65       | 0.08355         | 0.27976         | 317.09       |
| 0.02244                    | 0.08909         | 341.76       | 0.04251         | 0.15906         | 342.03       | 0.08698         | 0.28870         | 312.52       |
| 0.02411                    | 0.09522         | 342.47       | 0.04409         | 0.16425         | 342.30       | 0.09025         | 0.29710         | 307.05       |
| 0.02591                    | 0.10178         | 342.95       | 0.04596         | 0.17030         | 341.30       | 0.09276         | 0.30343         | 297.98       |
| 0.02622                    | 0.10293         | 343.11       |                 |                 |              |                 |                 |              |

\* values obtained from linear extrapolation of  $T = f(p)$  to a nominal pressure of 0.1 MPa.

**Table S4** Pressure effects on the liquid-liquid phase equilibria of [C<sub>10</sub>mim][NTf<sub>2</sub>] + aromatic solvent;  $x_{\text{IL}}$ ,  $w_{\text{IL}}$ ,  $p$ , and  $T$  are the mole and weight fraction of ionic liquid, pressure and temperature of transition, respectively.

| $x_{\text{IL}}$                                                    | $w_{\text{IL}}$ | $p/\text{MPa}$                                     | $T/\text{K}$ | $x_{\text{IL}}$ | $w_{\text{IL}}$ | $p/\text{MPa}$ | $T/\text{K}$ |
|--------------------------------------------------------------------|-----------------|----------------------------------------------------|--------------|-----------------|-----------------|----------------|--------------|
| [C <sub>10</sub> mim][NTf <sub>2</sub> ] + benzene                 |                 |                                                    |              |                 |                 |                |              |
| 0.00891                                                            | 0.05478         | 0.394                                              | 316.02       | 0.01978         | 0.11510         | 0.245          | 318.28       |
|                                                                    |                 | 1.004                                              | 315.80       |                 |                 | 0.511          | 318.22       |
|                                                                    |                 | 1.575                                              | 315.57       |                 |                 | 1.010          | 318.14       |
|                                                                    |                 | 3.065                                              | 315.23       |                 |                 | 2.085          | 318.02       |
|                                                                    |                 | 3.894                                              | 315.07       |                 |                 | 3.024          | 317.87       |
| 0.01187                                                            | 0.07184         | 4.755                                              | 314.92       | 0.03239         | 0.17749         | 4.464          | 317.69       |
|                                                                    |                 | 0.311                                              | 317.69       |                 |                 | 0.500          | 315.25       |
|                                                                    |                 | 0.939                                              | 317.57       |                 |                 | 1.008          | 315.08       |
|                                                                    |                 | 2.361                                              | 317.29       |                 |                 | 2.013          | 314.92       |
|                                                                    |                 | 2.992                                              | 317.21       |                 |                 | 3.054          | 314.57       |
|                                                                    |                 | 3.558                                              | 317.13       |                 |                 | 3.974          | 314.41       |
|                                                                    |                 | 4.364                                              | 316.98       |                 |                 | 4.749          | 314.28       |
|                                                                    |                 | [C <sub>10</sub> mim][NTf <sub>2</sub> ] + toluene |              |                 |                 |                |              |
| 0.01821                                                            | 0.09204         | 1.004                                              | 339.03       | 0.03572         | 0.16834         | 0.496          | 340.22       |
|                                                                    |                 | 1.994                                              | 337.75       |                 |                 | 1.010          | 339.62       |
|                                                                    |                 | 2.970                                              | 336.51       |                 |                 | 1.601          | 338.81       |
| 0.02375                                                            | 0.11736         | 0.198                                              | 341.00       |                 |                 | 2.412          | 337.68       |
|                                                                    |                 | 0.966                                              | 340.10       |                 |                 | 3.119          | 336.85       |
|                                                                    |                 | 1.632                                              | 339.18       |                 |                 | 3.584          | 336.30       |
| [C <sub>10</sub> mim][NTf <sub>2</sub> ] + $\alpha$ -methylstyrene |                 |                                                    |              |                 |                 |                |              |
| 0.02721                                                            | 0.10647         | 0.151                                              | 342.74       | 0.03737         | 0.14193         | 0.486          | 343.12       |
|                                                                    |                 | 0.498                                              | 342.57       |                 |                 | 0.986          | 342.91       |
|                                                                    |                 | 0.998                                              | 342.34       |                 |                 | 1.487          | 342.68       |
|                                                                    |                 | 1.463                                              | 342.06       |                 |                 | 2.157          | 342.37       |
|                                                                    |                 | 1.993                                              | 341.84       |                 |                 | 2.662          | 342.14       |
|                                                                    |                 | 2.536                                              | 341.60       |                 |                 | 3.100          | 341.97       |
|                                                                    |                 | 3.023                                              | 341.40       |                 |                 | 3.985          | 341.58       |
|                                                                    |                 | 3.496                                              | 341.21       |                 |                 | 3.534          | 341.74       |
| 0.03174                                                            | 0.12255         | 3.970                                              | 341.04       |                 |                 | 0.486          | 343.12       |
|                                                                    |                 | 1.519                                              | 342.58       |                 |                 | 0.986          | 342.91       |
|                                                                    |                 | 1.997                                              | 342.33       |                 |                 |                |              |
|                                                                    |                 | 2.530                                              | 342.07       |                 |                 |                |              |
|                                                                    |                 | 3.949                                              | 341.48       |                 |                 |                |              |
